# Supplementary material for: Development of a hematite nanotube and tyramine-based drug carrier against drug-resistant bacteria Klebsiella pneumoniae
Source: Royal Society of Chemistry journal article supplement (doi:10.1039/d2ra05216d), 2022-01-01
Supplement: d2ra05216d1.pdf [file d2ra05216d1.pdf]

## Development of hematite nanotube and tyramine-based drug carrier against drug-resistant bacteria *Klebsiella pneumoniae*

M. R. Ali<sup>1,2</sup>, M. S. Bacchu<sup>1,2</sup>, D. D. Ridoy<sup>1,2</sup>, P. L. Mozumder<sup>1,2</sup>, M. N. Hasan<sup>1,2</sup>, S. Das<sup>3</sup>, M. F. H. Palash<sup>3</sup>, S. Akter<sup>3</sup>, N. Sakib<sup>3</sup>, A. Khaleque<sup>1,2</sup>, D. Chakraborty<sup>4</sup>, M. Z. H. Khan<sup>1,2\*</sup>

<sup>1</sup>Dept. of Chemical Engineering, Jashore University of Science and Technology, Jashore 7408, Bangladesh

<sup>2</sup>Laboratory of Nano-bio and Advanced Materials Engineering (NAME), Jashore University of Science and Technology, Jashore 7408, Bangladesh

<sup>3</sup>Dept. of Microbiology, Jashore University of Science and Technology, Jashore 7408, Bangladesh

<sup>4</sup>Genome Centre, Jashore University of Science and Technology, Jashore 7408, Bangladesh

Corresponding Author: Dr. Md. Zaved H Khan; Email: zaved.khan@yahoo.com

### Supplementary Information

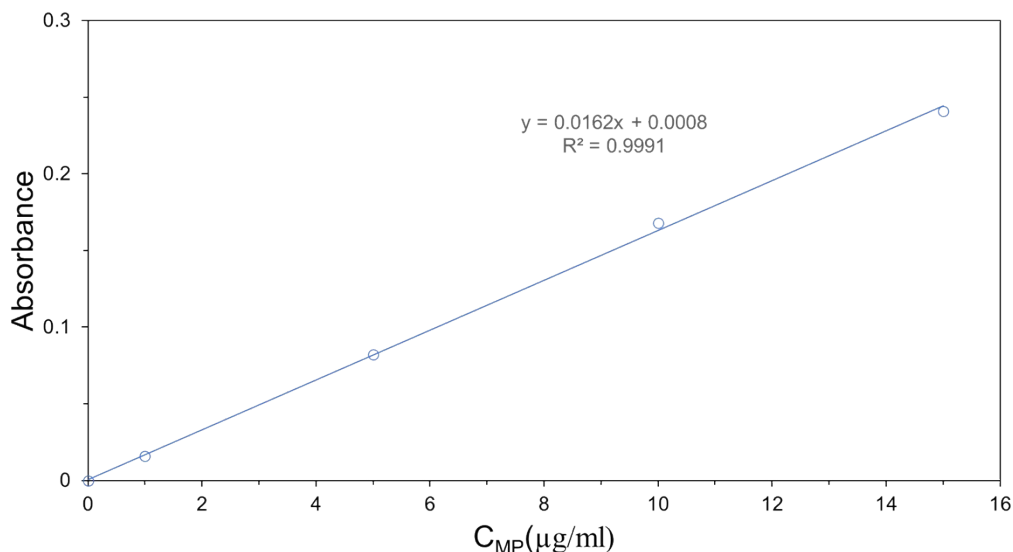

**Figure-1:** Calibration curve for determination of amount of MP loaded on the surface of Nano carrier
